# Supplementary material
Source: PubMed Central journal article supplement (PMC2494798)
Supplement: 00048.2007_1.pdf [file 00048.2007_1.pdf]

## **Legends of Supplemental Figures**

**Figure S1**, Changes in the white blood cell count with PM10 exposure (A), and Polymorphonuclear leukocyte count (B). Values are changes in absolute number of circulating cells relative to the baseline. The integrated sum represents the sum of changes over the four weeks ( $*p < 0.05$ , PM<sub>10</sub> vs. control).

## **Figure S2, The Relationship between Lung and Systemic Inflammation**

There was a significant correlation between circulating serum IL-6 levels at week one (relative to baseline) and the volume fraction of positive alveolar macrophages (Figure 3A,  $R^2 = 0.609$ ,  $p$ -value = 0.001) as well as activated alveolar macrophages (Figure 3B,  $R^2 = 0.573$ ,  $p$ -value = 0.002). Circles are data from control and crosses are data from PM<sub>10</sub> exposed rabbits.

## **Figure S3, The Relationship between Lung Inflammation and Acetylcholine (ACh) stimulated Vasodilatory Responses in Carotid Arteries**

There was a significant negative correlation between carotid endothelial dysfunction and the volume fraction of positive alveolar macrophages ( $R^2 = 0.363$ ;  $p = 0.023$ ; Figure 5 A) and the volume fraction of activated macrophages ( $R^2 = 0.389$ ;  $p = 0.017$ ; Figure 5 B). Circles are data from control and crosses are data from PM<sub>10</sub> exposed rabbits.
