# Supplementary material
Source: PubMed Central journal article supplement (PMC2494798)
Supplement: 00048.2007_5.pdf [file 00048.2007_5.pdf]

TableS-1. Circulating nitric oxide (NO) levels induced by exposed to PM<sub>10</sub> for 4 weeks.

| Group                   | Control        |                          | PM <sub>10</sub> |                          | p-value* |
|-------------------------|----------------|--------------------------|------------------|--------------------------|----------|
|                         | absolute level | relative to the baseline | absolute level   | relative to the baseline |          |
| Baseline                | 40.23 ± 5.79   | 0                        | 32.09 ± 5.29     | 0                        | NA       |
| NO week1                | 28.44 ± 2.62   | -11.79 ± 5.26            | 37.64 ± 3.57     | 5.54 ± 5.76              | 0.046    |
| NO week2                | 49.53 ± 8.34   | 6.84 ± 6.70              | 34.03 ± 5.17     | 1.93 ± 6.52              | 0.610    |
| NO week3                | 38.61 ± 5.23   | -1.62 ± 3.15             | 27.34 ± 1.86     | -8.77 ± 3.32             | 0.147    |
| NO week4                | 30.89 ± 4.77   | -10.34 ± 3.87            | 29.31 ± 2.30     | -4.18 ± 4.02             | 0.296    |
| Integrated <sup>†</sup> | 176.21 ± 24.32 | -16.41 ± 12.43           | 152.31 ± 16.63   | -3.63 ± 16.93            | 0.555    |

Rabbits were exposed to EHC93 (PM<sub>10</sub>) twice a week for 4 weeks, total 16 mg/kg.

All IL-6 data are expressed as mean ± SE (μmol/l)

\*p-value comparing the relative difference in NO levels from baseline between control and PM<sub>10</sub> groups.

†; sum of all measurements of NO across the 4 weeks
