# Supplementary material
Source: PubMed Central journal article supplement (PMC2494798)

A

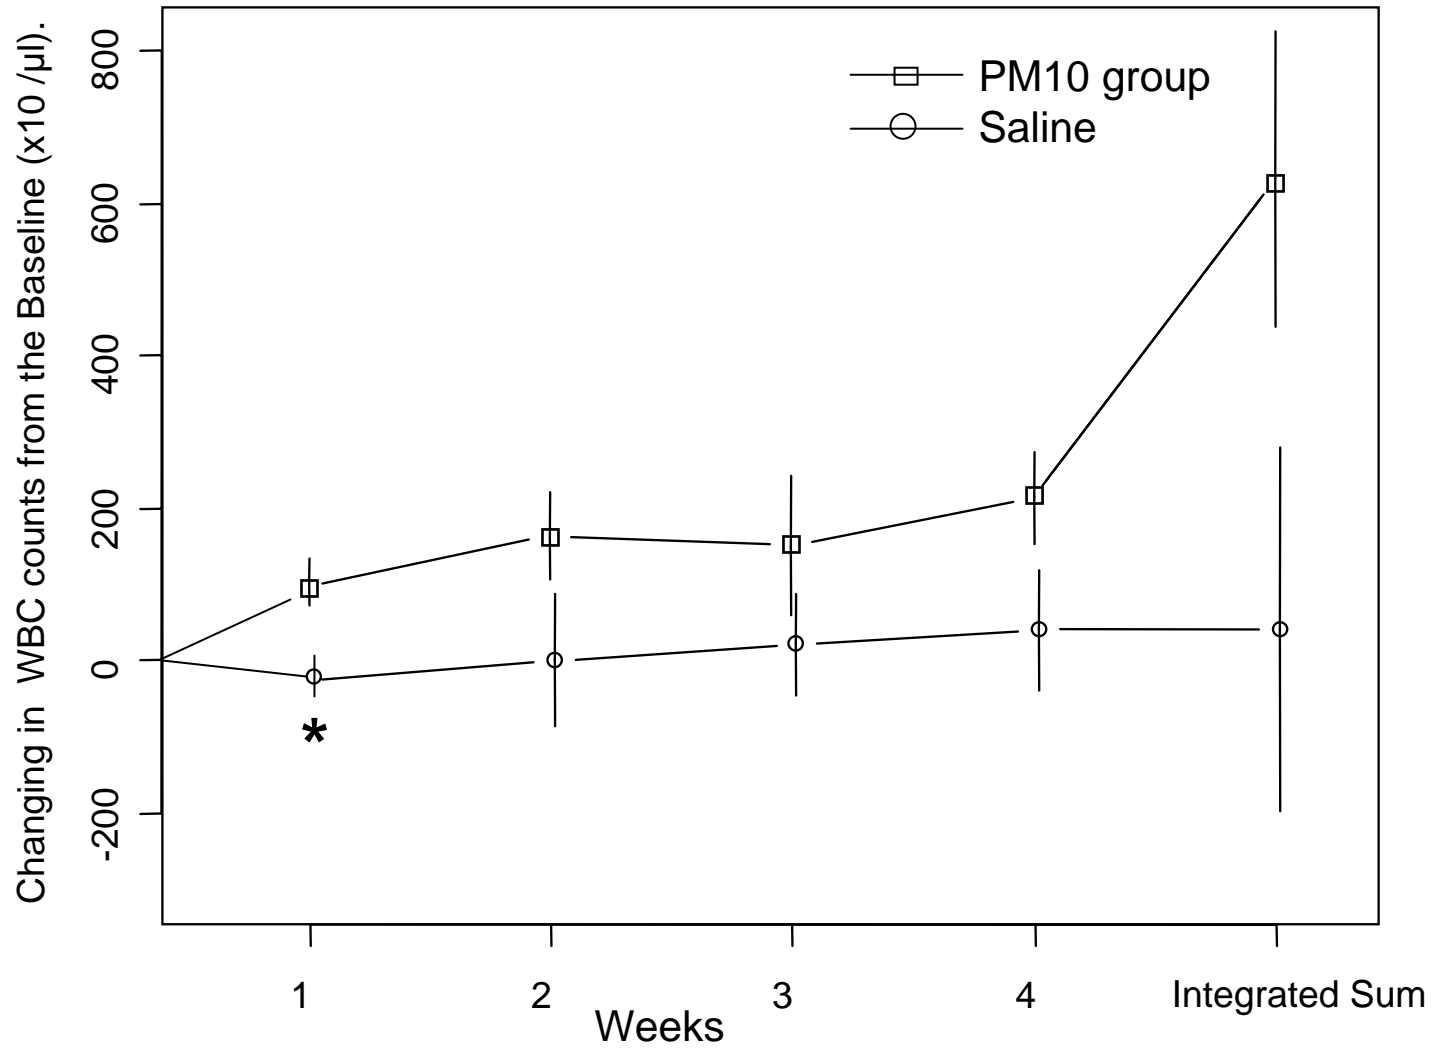

B

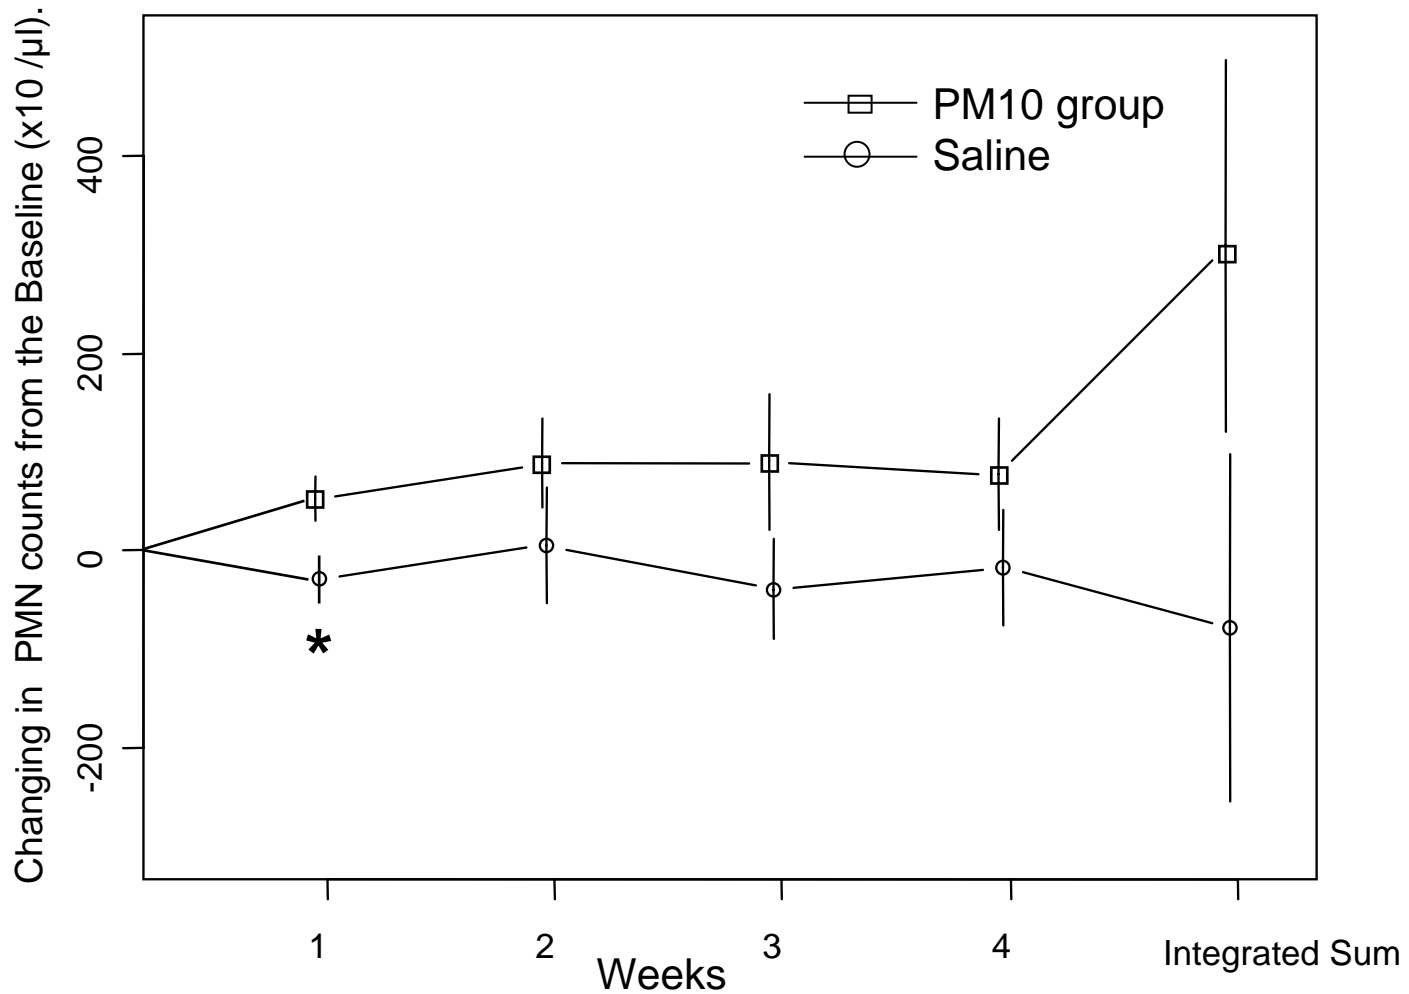

Supplement: 00048.2007_2.pdf [file 00048.2007_2.pdf]

**A**  
Volume Fraction of Positive Alveolar Macrophage

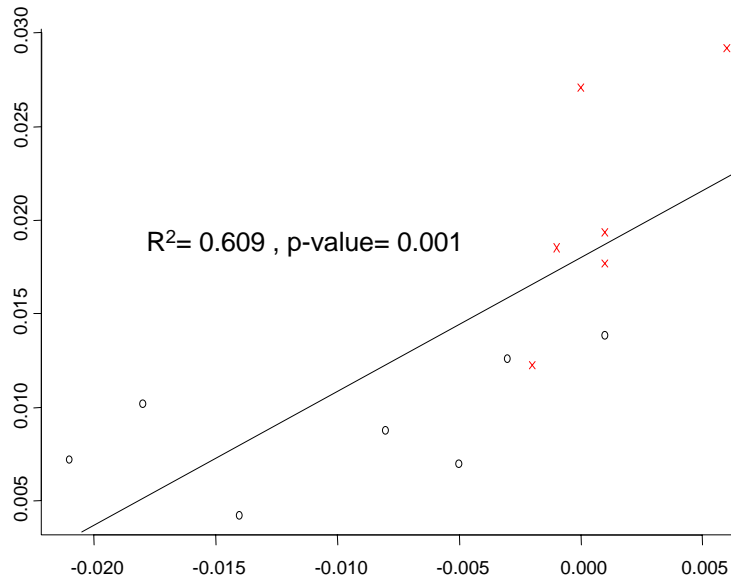

**B**

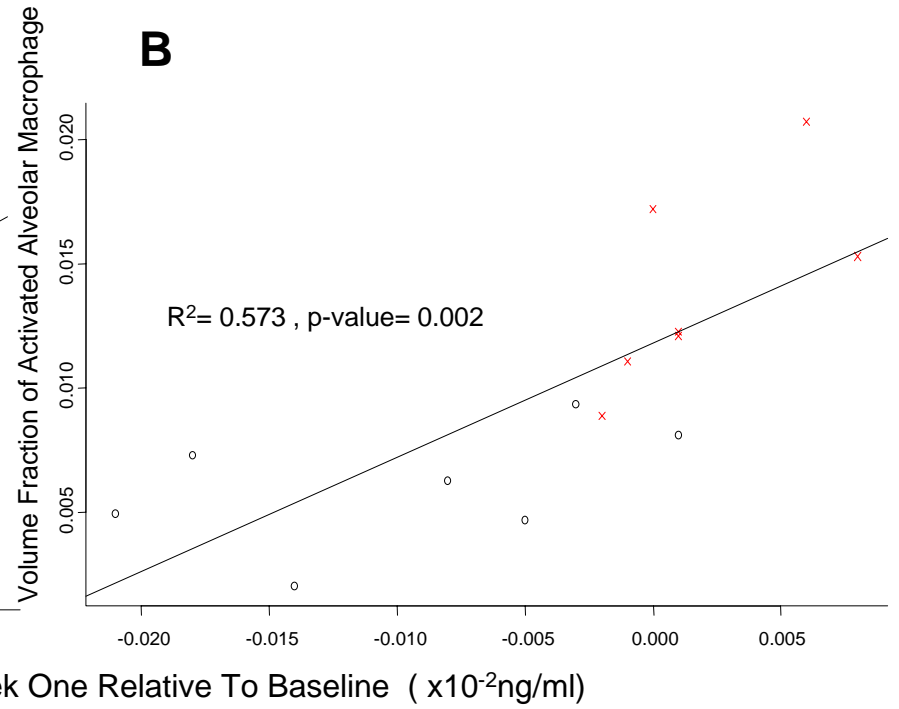

Supplement: 00048.2007_3.pdf [file 00048.2007_3.pdf]

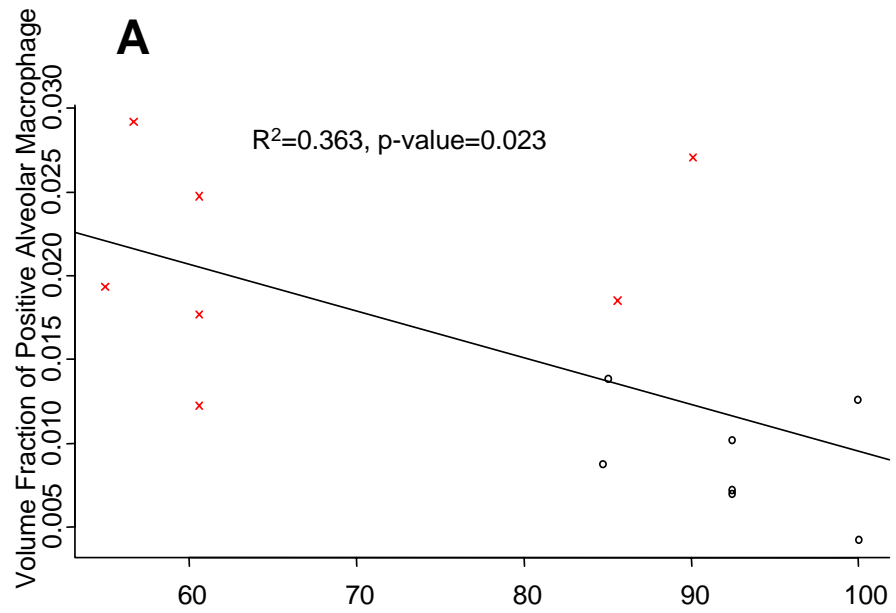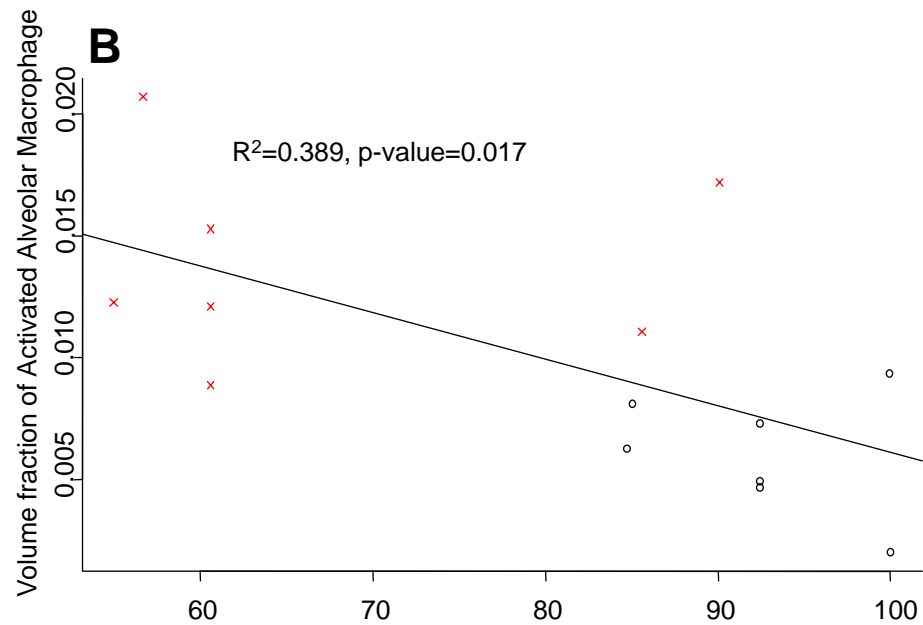

Supplement: 00048.2007_4.pdf [file 00048.2007_4.pdf]
